# Supplementary material for: MicroRNA Expression during Bovine Oocyte Maturation and Fertilization
Source: MDPI journal article supplement (doi:10.3390/ijms17030396), 2016-03-18
Supplement: s1 [file s1]

# Supplementary Materials: MicroRNA Expression during Bovine Oocyte Maturation and Fertilization

Graham C Gilchrist, Allison Tscherner, Thomas Nalpathamkalam, Daniele Merico and Jonathan LaMarre

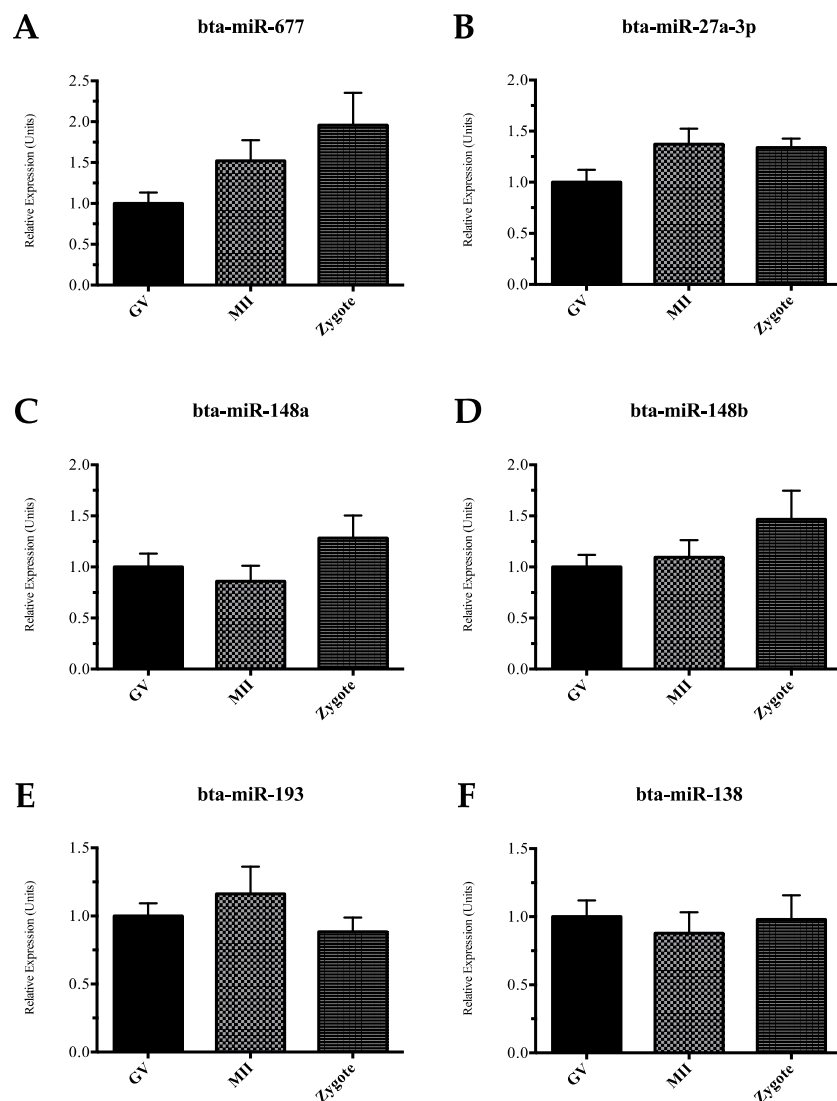

**Figure S1.** Quantitative PCR (qRT-PCR) validation of mature miRNAs in GV, MI, and PZ. (A–F): Expression relative to GV oocytes (1.0). Expression was normalized to U6 and cel-miR-39-3p performed in biological triplicates using pools of 20 oocytes.

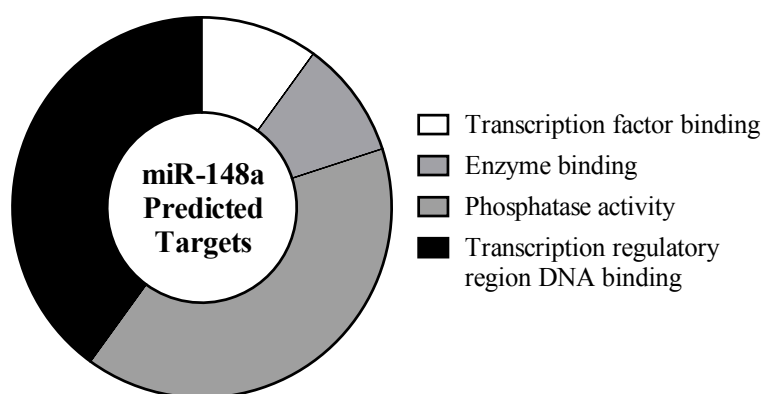

**Figure S2.** Distribution of predicted miR-148a targets into functional clusters as determined by “GO:Molecular Functions” analysis with pathway significance of  $p < 0.05$ . The size of each functional group is proportional to the number of sub-clusters under that biological theme starting at the top (white) moving clockwise.

Tables S1–S8 within Excel files in 4 different tabs.

**Table S1.** Presence of miRNA from Fig 1A into the respective sample in which it is detected.

**Table S2.** Differential expression of miRNA between GV and MII from Figure 2B.

**Table S3.** Differential expression of miRNA between MII and PZ from Figure 2C.

**Table S4.** Differential expression of miRNA between GV and PZ from Figure 2D.

**Table S5.** MicroRNA read count and expression fold-change from sequencing and q-RT-PCR validation results between GV and MII oocytes.

**Table S6.** MicroRNA read count and expression fold-change from sequencing and q-RT-PCR validation results between MII oocytes and PZ.

**Table S7.** MicroRNA read count and expression fold-change from sequencing and q-RT-PCR validation results between GV oocytes and PZ.

**Table S8.** Predicted protein targets of miRNAs present in the proteome signature from Deutsch et al. (2014) [30] with corresponding fold change between MII and Zygotes. Negative (–) values indicate higher expression in MII oocyte and positive (+) indicate the protein had a higher expression in zygotes.
